# Supplementary material
Source: PubMed Central journal article supplement (PMC5860464)

## Web Material

**Web Table 1.** Median (25<sup>th</sup>, 75<sup>th</sup> percentile) of Air Pollutants and Air Toxics by Exposure Window, Consortium on Safe Labor/Air Quality and Reproductive Health Study, 2002-2008 (*n* = 206,054).

|                                                         | 3 Months Preconception     | Trimester 1 <sup>a</sup>   | Gestational Weeks 1-20     |
|---------------------------------------------------------|----------------------------|----------------------------|----------------------------|
| <b>Criteria air pollutants</b>                          |                            |                            |                            |
| CO (ppb)                                                | 534.8 (415.8, 671.7)       | 544.8 (420.6, 684.4)       | 547.9 (428.1, 682.0)       |
| NO <sub>x</sub> (ppb)                                   | 24.5 (14.8, 43.2)          | 25.5 (15.2, 45.3)          | 26.8 (16.0, 45.0)          |
| O <sub>3</sub> (ppb)                                    | 29.8 (23.5, 35.9)          | 29.3 (22.8, 35.3)          | 29.1 (23.6, 34.4)          |
| SO <sub>2</sub> (ppb)                                   | 3.3 (2.1, 5.3)             | 3.3 (2.0, 5.3)             | 3.4 (2.0, 5.3)             |
| PM <sub>10</sub> (µg/m <sup>3</sup> )                   | 21.7 (18.7, 25.0)          | 21.6 (18.6, 25.0)          | 21.7 (19.0, 24.7)          |
| PM <sub>2.5</sub> (µg/m <sup>3</sup> )                  | 11.7 (9.0, 14.5)           | 11.9 (9.2, 14.6)           | 12.0 (9.4, 14.4)           |
| <b>PM<sub>2.5</sub> constituents (µg/m<sup>3</sup>)</b> |                            |                            |                            |
| Ammonium particles                                      | 1.4 (0.8, 2.0)             | 1.4 (0.9, 2.0)             | 1.5 (0.9, 2.0)             |
| Dust particles                                          | 1.6 (1.2, 2.3)             | 1.7 (1.2, 2.4)             | 1.7 (1.2, 2.3)             |
| Elemental carbon                                        | 0.6 (0.4, 0.8)             | 0.6 (0.4, 0.8)             | 0.6 (0.4, 0.8)             |
| Nitrate particles                                       | 1.3 (0.7, 2.8)             | 1.4 (0.7, 3.0)             | 1.6 (0.8, 2.9)             |
| Organic compounds                                       | 2.7 (2.1, 3.4)             | 2.7 (2.2, 3.4)             | 2.7 (2.2, 3.3)             |
| Sulfite particles                                       | 3.0 (1.7, 4.0)             | 2.9 (1.5, 3.9)             | 3.0 (1.6, 3.9)             |
| <b>Polycyclic aromatic hydrocarbons (ppb)</b>           |                            |                            |                            |
| Acenaphthene                                            | 1.9E-05 (7.2E-06, 4.4E-05) | 2.1E-05 (8.5E-06, 4.3E-05) | 2.2E-05 (8.9E-06, 4.3E-05) |
| Acenaphthylene                                          | 1.4E-04 (5.6E-05, 2.9E-04) | 1.5E-04 (6.7E-05, 2.9E-04) | 1.5E-04 (7.2E-05, 3.0E-04) |
| Anthracene                                              | 2.0E-05 (1.0E-05, 4.2E-05) | 2.6E-05 (1.2E-05, 4.7E-05) | 2.7E-05 (1.3E-05, 4.9E-05) |
| Benzo[a]-anthracene                                     | 2.1E-07 (2.2E-08, 6.2E-07) | 3.6E-07 (6.8E-08, 6.7E-07) | 4.0E-07 (8.0E-08, 6.5E-07) |
| Benzo[a]-pyrene                                         | 2.0E-09 (4.0E-14, 1.7E-07) | 1.6E-09 (4.1E-14, 3.2E-08) | 1.6E-09 (5.9E-14, 3.0E-08) |
| Chrysene                                                | 7.0E-06 (3.7E-06, 2.6E-05) | 6.5E-06 (3.6E-06, 2.0E-05) | 6.5E-06 (3.7E-06, 2.0E-05) |
| Fluoranthene                                            | 3.6E-05 (1.7E-05, 7.6E-05) | 3.7E-05 (1.8E-05, 7.5E-05) | 4.0E-05 (1.8E-05, 7.2E-05) |
| Fluorene                                                | 5.0E-05 (2.2E-05, 9.0E-05) | 5.3E-05 (2.4E-05, 9.0E-05) | 5.6E-05 (2.5E-05, 8.8E-05) |
| Ideno[1,2,3-Cd]pyrene                                   | 1.9E-17 (1.1E-17, 8.0E-08) | 1.6E-17 (1.0E-17, 3.5E-11) | 1.6E-17 (1.0E-17, 2.7E-10) |

|                                         |                            |                            |                            |
|-----------------------------------------|----------------------------|----------------------------|----------------------------|
| Napthalene                              | 5.6E-03 (3.3E-03, 1.0E-02) | 5.7E-03 (3.4E-03, 9.8E-03) | 5.9E-03 (3.5E-03, 9.2E-03) |
| Phenanthrene                            | 1.7E-04 (7.5E-05, 3.4E-04) | 1.8E-04 (8.0E-05, 3.3E-04) | 1.8E-04 (8.3E-05, 3.2E-04) |
| Pyrene                                  | 2.7E-05 (1.3E-05, 5.4E-05) | 2.8E-05 (1.4E-05, 5.3E-05) | 3.0E-05 (1.4E-05, 5.3E-05) |
| <b>Volatile organic compounds (ppb)</b> |                            |                            |                            |
| Benzene                                 | 4.4E-05 (4.1E-08, 3.5E-04) | 4.3E-05 (3.8E-08, 3.4E-04) | 4.3E-05 (7.8E-08, 3.1E-04) |
| 1,3-butadiene                           | 2.9E-04 (7.2E-06, 2.1E-03) | 2.9E-04 (7.3E-06, 2.1E-03) | 3.0E-04 (7.9E-06, 1.9E-03) |
| Cyclohexane                             | 4.2E-05 (1.6E-06, 1.4E-04) | 4.7E-05 (2.1E-06, 1.4E-04) | 4.9E-05 (2.2E-06, 1.2E-04) |
| Ethylbenzene                            | 6.2E-07 (6.2E-17, 3.6E-06) | 6.7E-07 (6.3E-17, 3.5E-06) | 6.5E-07 (1.0E-16, 3.4E-06) |
| Methyl-tertiary butyl ether             | 1.7E-07 (8.9E-19, 4.7E-05) | 3.2E-08 (1.1E-18, 4.7E-05) | 3.0E-08 (2.1E-18, 4.2E-05) |
| Methy ethyl ketone                      | 2.6E-05 (4.5E-07, 3.0E-04) | 2.0E-05 (4.6E-07, 3.0E-04) | 2.0E-05 (4.9E-07, 2.6E-04) |
| M-xylene                                | 7.6E-05 (2.3E-06, 7.9E-04) | 7.5E-05 (2.4E-06, 7.8E-04) | 7.2E-05 (2.6E-06, 7.0E-04) |
| N-hexane                                | 9.0E-05 (3.3E-06, 6.6E-04) | 9.0E-05 (3.4E-06, 6.6E-04) | 8.8E-05 (3.7E-06, 5.9E-04) |
| O-xylene                                | 8.0E-08 (8.7E-19, 2.3E-05) | 3.5E-11 (1.0E-18, 2.2E-05) | 2.7E-10 (1.7E-18, 2.0E-05) |
| P-xylene                                | 1.0E-02 (5.5E-04, 3.2E-02) | 9.8E-03 (5.6E-04, 3.1E-02) | 9.2E-03 (5.9E-04, 2.9E-02) |
| Propene                                 | 3.4E-04 (1.1E-05, 4.1E-03) | 3.3E-04 (1.2E-05, 4.0E-03) | 3.2E-04 (1.3E-05, 3.6E-03) |
| Sesquiterpene                           | 5.4E-05 (1.6E-06, 4.8E-04) | 5.3E-05 (1.6E-06, 4.7E-04) | 5.3E-05 (1.6E-06, 4.0E-04) |
| Styrene                                 | 4.4E-05 (4.1E-08, 3.5E-04) | 4.3E-05 (3.8E-08, 3.4E-04) | 4.3E-05 (7.8E-08, 3.1E-04) |
| Toluene                                 | 2.9E-04 (7.2E-06, 2.1E-03) | 2.9E-04 (7.3E-06, 2.1E-03) | 3.0E-04 (7.9E-06, 1.9E-03) |

<sup>a</sup>Trimester 1 refers to gestational weeks 1-13.

**Web Table 2.** Adjusted Relative Risks (95% Confidence Intervals) for Gestational Hypertension Associated With An Interquartile-Range Increment of Individual Criteria Air Pollutant and PM<sub>2.5</sub> Constituent by Exposure Window, Consortium on Safe Labor/Air Quality and Reproductive Health Study, 2002-2008 (*n* = 206,054)<sup>a</sup>

|                                      | <b>3 Months Preconception</b> | <b><i>P</i> value<sup>b</sup></b> | <b>Trimester 1<sup>c</sup></b> | <b><i>P</i> value<sup>b</sup></b> | <b>Gestational Weeks 1-20</b> | <b><i>P</i> value<sup>b</sup></b> |
|--------------------------------------|-------------------------------|-----------------------------------|--------------------------------|-----------------------------------|-------------------------------|-----------------------------------|
| <b>Criteria pollutants</b>           |                               |                                   |                                |                                   |                               |                                   |
| CO                                   | 0.93 (0.88, 0.99)             | 0.056                             | 0.94 (0.88, 0.99)              | 0.060                             | 0.94 (0.88, 1.00)             | 0.062                             |
| NO <sub>x</sub>                      | 1.07 (0.98, 1.17)             | 0.230                             | 1.11 (1.01, 1.21)              | 0.038                             | 1.17 (1.06, 1.29)             | 0.008                             |
| O <sub>3</sub>                       | 0.94 (0.89, 1.00)             | 0.166                             | 1.00 (0.94, 1.07)              | 0.964                             | 0.99 (0.93, 1.05)             | 0.864                             |
| PM <sub>2.5</sub>                    | 1.04 (0.98, 1.10)             | 0.355                             | 1.08 (1.02, 1.15)              | 0.020                             | 1.10 (1.03, 1.17)             | 0.021                             |
| PM <sub>10</sub>                     | 1.05 (1.00, 1.10)             | 0.166                             | 1.05 (1.00, 1.11)              | 0.070                             | 1.07 (1.01, 1.13)             | 0.036                             |
| SO <sub>2</sub>                      | 1.18 (1.08, 1.29)             | 0.001                             | 1.22 (1.11, 1.34)              | 0.001                             | 1.22 (1.10, 1.35)             | 0.001                             |
| <b>PM<sub>2.5</sub> constituents</b> |                               |                                   |                                |                                   |                               |                                   |
| Ammonium particles                   | 0.99 (0.93, 1.06)             | 0.841                             | 1.01 (0.95, 1.07)              | 0.868                             | 1.01 (0.94, 1.08)             | 0.875                             |
| Dust particles                       | 1.08 (1.03, 1.13)             | 0.006                             | 1.07 (1.03, 1.12)              | 0.012                             | 1.08 (1.03, 1.13)             | 0.006                             |
| Elemental carbon                     | 0.99 (0.93, 1.05)             | 0.841                             | 1.06 (1.00, 1.12)              | 0.095                             | 1.08 (1.01, 1.14)             | 0.036                             |
| Nitrate particles                    | 0.98 (0.93, 1.04)             | 0.798                             | 0.97 (0.92, 1.03)              | 0.503                             | 0.99 (0.93, 1.05)             | 0.964                             |
| Organic compounds                    | 1.00 (0.94, 1.05)             | 0.869                             | 1.06 (1.00, 1.12)              | 0.070                             | 1.04 (0.98, 1.11)             | 0.234                             |
| Sulfite particles                    | 1.01 (0.95, 1.07)             | 0.841                             | 1.03 (0.96, 1.10)              | 0.515                             | 1.00 (0.93, 1.08)             | 0.095                             |

<sup>a</sup>Adjusted for study site, race/ethnicity, marital status, insurance, parity, pre-pregnancy body mass index, chronic disease before pregnancy (diabetes mellitus, asthma, thyroid disease, HIV), smoking during pregnancy, alcohol consumption during pregnancy, and season of conception.

<sup>b</sup>*P* values were adjusted by the FDR method within each exposure window for criteria air pollutants and PM<sub>2.5</sub> constituents, respectively.

<sup>c</sup>Trimester 1 refers to gestational weeks 1-13.

**Web Figure 1.** Simulation Extrapolation Results For (A) 10% of Total Variation due to Measurement Error and (B) 20% of Total Variation due to Measurement Error in the Exposure to SO<sub>2</sub> During the First Trimester, Consortium on Safe Labor/Air Quality and Reproductive Health Study, 2002-2008.

(A)

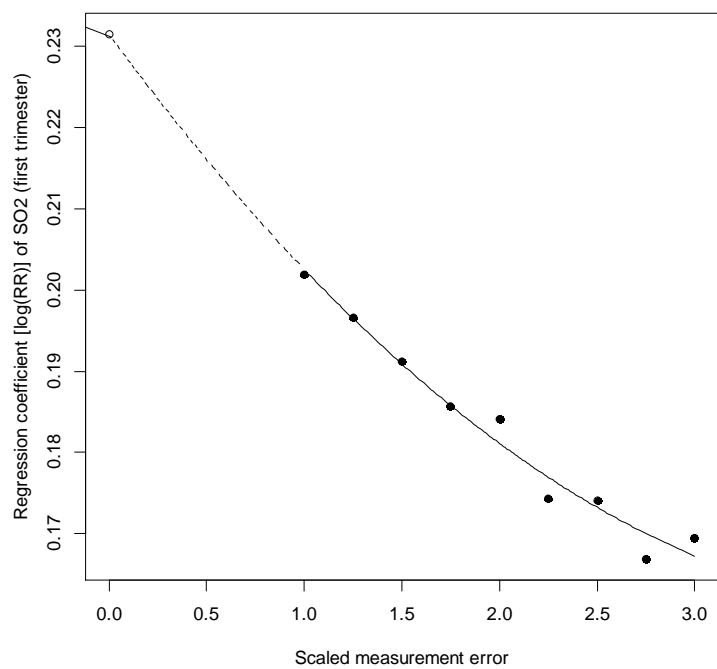

(B)

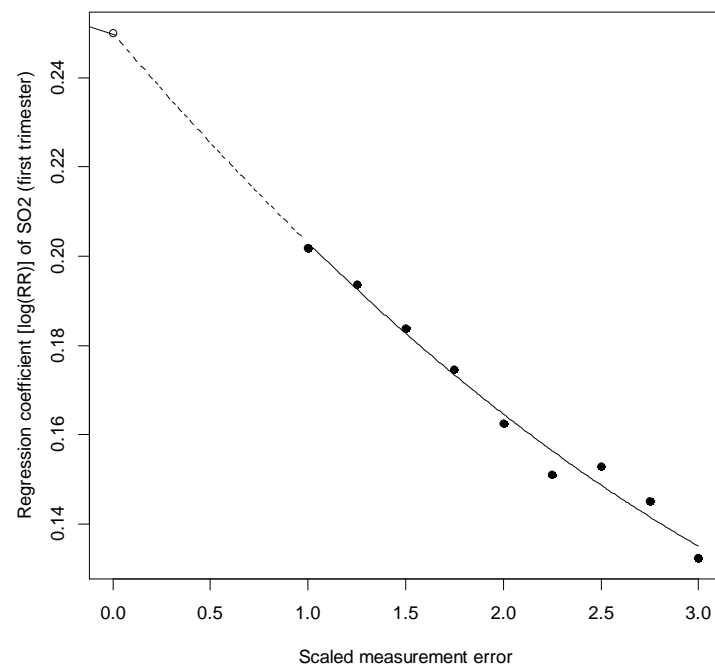

Supplement: kwx097zhuwebmaterialfinal.pdf [file kwx097zhuwebmaterialfinal.pdf]
